# Supplementary material
Source: PubMed Central journal article supplement (PMC7611032)

### 3. SUPPLEMENTARY FIGURE LEGENDS

**Fig. S1. CRISPR/Cas9- and PhiC31-mediated genome editing for expression from endogenous loci.** (A) Site-specific insertion of an *attP* landing site into the *ptc* locus (to generate *ptc*[KO; *attP*, *pax-Cherry*]), using CRISPR/Cas9-mediated homologous recombination (see Methods). The red fluorescence of *pax-Cherry* served to identify candidates and can be used to track the allele. (B) PhiC31 integrase-mediated integration of DNA fragments in the *attP* site. Here, mini *white* (red eyes) was used to select candidates. Insert not drawn to scale.

**Fig. S2. GFP can diffuse in and out of imaginal discs.** (A) Schematic representation of the paths a diffusing protein can take following secretion (diffusion through the basolateral space and exchange with the hemolymph). The fat body is a large adipose tissue with extensive contact with the hemolymph. (B) Diffusion out of imaginal discs (*in vivo*). Western blot of hemolymph and wing discs collected from larvae expressing *UAS-SecGFP* under the control of *vg-Gal4* (active only in wing/haltere primordia). The presence of GFP in the hemolymph shows that GFP can cross the basal lamina and leak out of the disc. (C) Diffusion into imaginal discs (*in vivo*). SecGFP produced by the fat body (*lpp-Gal4*, *UAS-SecGFP*) was captured by imaginal discs expressing *LexAop-Nb1<sup>high</sup>CD8* under the control of *dpp-LHG*. (D) Diffusion into imaginal discs (*ex vivo*). Imaginal discs expressing *UAS-Nb1<sup>high</sup>CD8* under the control of *dpp-Gal4* were bathed in GFP conditioned medium for 30 min at room temperature and washed before imaging. Note the accumulation of GFP at the surface of *dpp*-expressing cells. GFP was not found on the apical side, which is separated from the GFP bath by septate junctions. Scale bars: 50  $\mu$ m.

**Fig. S3. Modeling the apical gradient.** (A) Nb1<sup>high</sup>CD8 in the apical (left) and lateral (right) domain of a *ptc-SecGFP*, *hh-Nb1<sup>high</sup>CD8* wing disc. (B) Measurements of the fluorescent intensity suggest a ~4-fold higher level of Nb1<sup>high</sup>CD8 in the apical than in the basolateral domain. (C) Fluorescence intensity profiles in the apical space for *hh-Nb1<sup>high</sup>CD8* (n=12) and *hh-Nb1<sup>high</sup>CD8* + fat-body trap (n=12). The two profiles are largely overlapping, indicating that the apical gradient is unaffected by GFP trapping in the hemolymph. (D) Comparison of the apical profiles (dotted lines) with the corresponding basolateral profiles (solid lines; also shown in Fig. 1D) for *hh-Nb1<sup>high</sup>CD8* (green) and *hh-Nb1<sup>low</sup>CD8* (blue). All profiles are normalized to the GFP fluorescence intensity at the source. GFP levels are generally larger in the apical domain than in the basolateral domain. (E) Model prediction for the profiles shown in (D). The model is as for the basolateral gradient but takes into account the absence of leakage, the change in geometry of the intercellular space and an increased receptor density (see section 1.8 in the Supplementary Theory for details). With these modifications, the model captures the main features of the apical gradient.

**Fig. S4. Nanobody-mediated fluorescence boosting has a limited impact on model predictions.** GFP fluorescence is modulated by binding to nanobodies (16). For example, *in vitro*, Nb1<sup>high</sup> boosts GFP fluorescence by 50%. Here, we investigate the impact of this effect on the model's predictions. Panels (A,C,E) assume equal fluorescence intensity when GFP is bound

to  $Nb1^{high}CD8$  or  $Nb1^{low}CD8$ , and are plotted using the parameters listed in Table S2. Panels (B,D,F) assume the intensity of GFP is 1.5 larger when bound to  $Nb1^{high}CD8$  than free or bound to  $Nb1^{low}CD8$ , and are plotted using the parameters fitted to the adjusted GFP intensity profiles  $j = 0.32 \text{ nM} \cdot \text{s}^{-1}$ ,  $\kappa = 0.07 \text{ s}^{-1}$ ,  $\bar{k}_H = 0.0052 \text{ s}^{-1}$ ,  $\bar{k}_H^{FB} = 0.15 \text{ s}^{-1}$ ,  $j_r = 0.003 \text{ nM} \cdot \mu\text{m} \cdot \text{s}^{-1}$ .

(A-B) Bound GFP profiles normalized to the total concentration of receptor (panel A is as in Fig. 2C. The blue and green curves are obtained by using the known on and off rates for the low- and high-affinity receptors respectively; purple curve is obtained by increasing degradation in the hemolymph. (C-D) Predicted GFP profile following 20-fold increase in binder expression (orange curve compared to green curve), normalized to the lower value of the total concentration of receptors. Panel C is as in Fig. 3A. (E-F) Predicted bound GFP profiles for *ptc-SecGFP*, *hh-Nb1<sup>high</sup>CD8* (green curve, as shown in Fig. 2C) and for an increasing rate of SecGFP production  $j$  (curves with increasing magenta intensity). Normalization as in Fig. S6A. Panel E is as in Fig. S6A. Profiles are normalized to the total concentration of receptor.

**Fig. S5. A diffusion-degradation-leakage gradient model.** Parameters are stated in Table S2, unless specified otherwise. (A) Schematic of one-dimensional model geometry. The mean intercellular distance is denoted  $h$  (upper schematic). The width of the source is denoted  $L_S$ , the width of the anterior and posterior compartments  $L$  (lower schematic). (B) A threshold level of surface density of bound receptors  $n_b^*$  determines the boundary of the activation domain ( $x^*$ ) of a hypothetical downstream target (orange). (C) Profiles of bound receptors surface density, for different values of the total receptor surface density, in the absence of ligand in the hemolymph. The effect of receptor saturation is neglected in these plots, allowing for analytical results. Elevating receptor surface density results in an increase of concentration near the source and a reduction of the characteristic length scale.  $n_b^*$  (blue dashed line) indicates a hypothetical threshold for target gene activation.  $j = 0.05 \text{ nM} \cdot \text{s}^{-1}$ ,  $k = 2.6 \times 10^{-5} \text{ s}^{-1}$ ,  $n_T = 15 \text{ nM} \cdot \mu\text{m}$  (brown),  $40 \text{ nM} \cdot \mu\text{m}$  (green),  $200 \text{ nM} \cdot \mu\text{m}$  (red),  $c_H = 0$ ,  $n_b^* = 10 \text{ nM} \cdot \mu\text{m}$ ; other parameters are stated in Table S2. (D) On/off target boundary ( $x^*$ ) as a function of the total receptor surface density, in the absence of receptor saturation and ligands in the hemolymph. The activation threshold ( $n_b^* = 10 \text{ nM} \cdot \mu\text{m}$ ) in panel C was used to determine  $x^*$  for different receptor surface density (dots corresponds to curves with the same color in panel C). A maximal target domain size can be found for intermediate values of the total receptor surface density. (E) Profiles of bound receptors surface density, for different values of the total receptor surface density, considering the presence of ligand in the hemolymph.  $j = 0.01 \text{ nM} \cdot \text{s}^{-1}$ ,  $k = 2.6 \times 10^{-5} \text{ s}^{-1}$ ,  $n_T = 1 \text{ nM} \cdot \mu\text{m}$  (brown),  $3 \text{ nM} \cdot \mu\text{m}$  (green),  $100 \text{ nM} \cdot \mu\text{m}$  (red),  $800 \text{ nM} \cdot \mu\text{m}$  (purple),  $\bar{k}_H = 0.01 \text{ s}^{-1}$ ,  $n_b^* = 0.7 \text{ nM} \cdot \mu\text{m}$ ; other parameters are stated in Table S2. (F) Phase diagram of target activation domain size, as a function of total receptor surface density and effective ligand degradation rate in the hemolymph. Receptor saturation is not taken into account. At low receptor density level, no activation occurs; at intermediate receptor density and for low enough degradation in the hemolymph, a region of full activation appears (dots correspond to curves with the same color in panel E); the third domain of parameter space is that of biologically relevant spatially restricted activation. Parameters as in panel E. (G) Phase

diagram as described for panel F, but with receptor saturation included. Color code corresponds to the size of the activated domain. **(H, I, J, K)** Free ligand concentration (H, J) and effective 3D bound receptor concentration (as opposed to membrane density) in the intercellular space (I, K) profiles for different  $k_{on}$  (H, I) and,  $k_{off}$  values (J, K). The relative levels of free ligand concentration and effective 3D bound receptor concentration indicate that the GFP fluorescence profile is largely dominated by bound receptors.  $n_T = 80\text{nM} \cdot \mu\text{m}$ , and other parameters as in Table S2.

**Fig. S6. Increasing ligand production extends and flattens the gradient. (A)** Bound GFP profile calculated from the diffusion-degradation-leakage model, normalized to the total concentration of receptors. Predicted profiles for parameters given in Table S2 (green curve, as shown in Fig. 2C, corresponding to the *ptc-SecGFP*, *hh-Nb1<sup>high</sup>CD8* experiments) and for an increasing rate of secreted GFP production in the source (curves with increasing magenta intensity). The gradient shape changes and flattens as a result of increased binder saturation and GFP entering the tissue from the hemolymph. Other parameters are taken from Table S2. **(B)** Wing disc expressing ligand and binder as in Fig. 1C (*ptc-SecGFP*, *hh-Nb1<sup>high</sup>CD8*). **(C)** Increasing SecGFP (*ptc-Gal4*, *UAS-SecGFP*, *hh-Nb1<sup>high</sup>CD8*) lengthens the gradient range and saturates binders up to 40  $\mu\text{m}$  from the source. **(D)** Fluorescence profiles obtained from panels B and C (compare to curves in panel A). Since the source intensity was different in the two experiments, values were not normalized. *ptc-SecGFP*, *hh-Nb1<sup>high</sup>CD8*,  $n=6$ ; *ptc-Gal4*, *UAS-SecGFP*, *hh-Nb1<sup>high</sup>CD8*,  $n=7$ . Scale bars: 20  $\mu\text{m}$ .

**Fig. S7. Experimental estimates of receptor numbers and degradation rate. (A)** Normalized fluorescent GFP intensity in *hh-Nb1<sup>high</sup>CD8* (green bar) and *hh-Gal4*, *UAS-Nb1<sup>high</sup>CD8* (orange bar) after *ex vivo* incubation in a 400 nM GFP bath on ice (see methods). The difference in GFP intensity suggests that Gal4-mediated expression leads to a ~20 fold increase in surface receptor levels. **(B)** Nb1<sup>high</sup>CD8-expressing discs were saturated with GFP on ice, washed, incubated for different durations in Schneider's medium at 25°C, and imaged. Normalized GFP intensity in *hh-Nb1<sup>high</sup>CD8* wing discs decreased by ~25% over the time course of 6 h. Since GFP is quenched in late endosomes due to a low pH (58), this observation suggests that Nb1<sup>high</sup>CD8 is degraded only slowly (on the scale of several hours as predicted by modelling). **(C)** The same experiment with *hh-Nb1<sup>high</sup>GPI* wing discs suggests almost no degradation of Nb1<sup>high</sup>GPI over the time course of 4 h. **(D-F)** To estimate the concentration of Nb1<sup>high</sup>CD8 at the cell surface, a GFP invasion assay was used. *hh-Nb1<sup>high</sup>CD8* discs were incubated in 2 nM, 20 nM and 200 nM GFP baths for 5 min at 25°C. The resulting basal-to-apical GFP gradient in the posterior compartment was imaged (D) and quantified (F). A simple model (see (E) and section 1.7 of Supplementary Theory) was used to fit the measured GFP fluorescence profiles (G) and derive the surface density and lateral diffusion constant of binders.

**Fig. S8. Engineering receptors that activate Dpp signaling in response to GFP. (A)** Dpp dimers normally bring together a pair of type I (Tkv, red) and a pair of type II receptors (Put, blue) to promote phosphorylation (black dots) of the downstream effector Mad. These receptors

were rendered GFP-responsive by inserting anti-GFP nanobodies in the extracellular domain, as previously described for cytokine receptors (59). (B) S2 cells became responsive to GFP upon expression of these engineered receptors. S2 cells were transfected with CMV-Nb1<sup>high</sup>Put, CMV-Nb2<sup>high</sup>Tkv and tubulin-FLAG:Mad. Thirty six hours later, cells were incubated with mock medium, GFP conditioned medium, GFP dimer conditioned medium or commercially available GFP (5 ng/ml) and protein was extracted for Western blotting. Phosphorylation of Mad was seen within 30 min of adding GFP or GFP dimers in the medium. Syntaxin was used as a loading control. Activation by GFP monomer shows that dimers are not required, indicating some flexibility about the ligand configuration needed for activation (60).

**Fig. S9. Validation of the *dpp-[/>HA:Dpp>SecGFP:GFP]* allele.** (A) In wing discs homozygous for *dpp-[/>HA:Dpp>SecGFP:GFP]*, HA-tagged Dpp is the sole source of Dpp protein. In the absence of Flp, HA:Dpp is expressed in a stripe of cells along the A/P boundary. (B) Expression of Flp in the wing pouch with *rotund-Gal4 (rn-Gal4)* (61), results in the loss of HA:Dpp and *de novo* GFP expression in the *Dpp*-producing cells. (C, D) In the absence of Flp (same genotype as panel A), Brk forms the same inverse gradient as in wild type discs. Upon Flp expression (same genotype as panel B), Brk is expressed throughout pouch, as expected from removal of Dpp signaling. Scale bars: 50  $\mu$ m.

**Fig. S10. Progressive downregulation of signaling within the source of GFP.** (A) Key components of the SR rescue configuration: the ligand, SecGFP:GFP, expressed instead of Dpp and the engineered signaling receptors (SR), expressed under the control of the *ubiquitin* promoter. Under these conditions pMad immunoreactivity is high on either side of the SecGFP:GFP expression domain (as expected), but with an unexpected zone of reduced activity inside the source (Fig. 4D, column 3). (B, C) The band of reduced signaling activity is not due to receptor down-regulation since the profile of V5-tagged Nb2<sup>high</sup>Tkv (n=5) actually shows a slight upregulation at the anterior side of the boundary. (D-F) pMad immunoreactivity in discs of various stages (same genotype as in Fig. 4D, column 3, SR) shows that the band of pMad reduction develops over time. While pMad immunoreactivity is detected throughout the GFP-expressing domain in early (~74 h after egg laying (AEL)) and mid (~96 h AEL) 3<sup>rd</sup> instar wing discs, it was markedly decreased in the GFP-producing cells of late 3<sup>rd</sup> instar wing discs. One possibility is that desensitization results from receptor inactivation in cis by high level of ligand or from depletion of free surface receptors over time. Scale bars: 50  $\mu$ m.

**Fig. S11. Overexpression of low-affinity non-receptors inhibits signaling by GFP.**

Immunofluorescence analysis (proteins indicated) shows signaling activity in two genotypes. Left column shows a control disc (same genotype as in the first column of Fig. 4). Right column shows a disc lacking Dpp but expressing SecGFP:GFP and the engineered signaling receptors (SR) and also ‘over-expressing’ Nb<sup>low</sup>GPI (*rn-Gal4, UAS-Nb<sup>low</sup>GPI*). By comparison to the positive control and SR only rescue (Fig. 4, column 3, no *UAS-Nb<sup>low</sup>GPI*), pMad is strongly decreased. Moreover, Brk is somewhat derepressed, the expression domain of Omb is narrow,

Sal is nearly absent from the posterior compartment, and DSRF immunoreactivity does not reveal distinguishable proveins L2 and L5. As expected then, the resulting wings are poorly patterned. Scale bar wing discs: 50  $\mu$ m. Scale bar adult wings: 0.25 mm.

**Fig. S12. Addition of GPI-anchored non-signaling receptors reduces wing size variation.**

Genotypes (only males) are indicated. Mean and standard derivation are shown. Coefficient of variation as follows: positive control: 2.76%; negative control: 15.63%; SR: 9.38%; SR+NR: 3.56%; SR+ SR: N/A (n too small). Wings rescued by SR were more variable in size than wild type wings and this was partially rescued by addition of NR expressed from the *dally* locus.

**Fig. S13. Role of hopping and handover of the non-signaling receptor. (A)** Diffusion-leakage-degradation models with one or two receptor types, as discussed in Supplementary Theory: (a) simple model of ligand binding to immobile, membrane-bound receptors. (b) As in (a), but with receptor release from the membrane and subsequent reinsertion. (c) As in (a) but considering effective diffusion of receptors at the surface of the tissue, through membrane diffusion and hopping. (d) As in (c), but with two receptor types: one type of receptor is allowed to hop and diffuse, while the second type remains membrane-bound and immobile. The two receptor types are color-coded according to the convention for SR/NR followed in Fig. 5. **(B)** Signaling activity profile predicted by the simplified model of panel A(d) in the three experimental conditions of interest, namely SR (blue), SR+SR (green), SR+NR (red). These gradients are qualitatively similar to those shown in Fig. 5B. See Supplementary Theory for parameters. **(C)** Schematic of the reactions involved in the two-receptor model with GFP dimer (as in Fig. 5A). The arrows indicate reversible transitions and have been labelled according to the notation introduced in Supplementary Theory. The colored boxes contain subgraphs corresponding to the different mechanisms at play in the model, namely single and double binding to receptors (red), handover (orange), hopping (blue). **(D)** Concentration gradient of signaling complex obtained from the two-receptor model with GFP dimer shown in (C), for different choices of effective NR diffusion coefficient  $D_r$ . Introducing a non-diffusing NR (orange curve) shortens the gradient compared to the case with SR only (blue curve). In line with our analytical calculations, the gradient length scale is however observed to increase with increasing NR diffusion constant  $D_r$ . The dotted line indicates 1/e of the maximal value of the SR only profile, used to determine gradient extension factors in panel (E). Other parameters are as described in Supplementary Theory. **(E)** Blue line: Gradient extension factor as a function of the effective NR diffusion coefficient  $D_r$  (other parameters are as described in Supplementary theory), in the simplified model with two receptors (panel A (d)), in the regime far from receptor saturation (see section 2.1.3 in Supplementary Theory for details). The gradient extension factor is defined as the ratio of the longer gradient length scale for a given value of  $D_r$  and for  $D_r = 0$ , with other parameters kept the same. The dashed line indicates no extension of the gradients, and its intersection with the blue line sets the threshold diffusion coefficient  $D_r^*$  for gradient extension. Square marks: gradient extension factor obtained with characteristic length scales extracted from the curves in Panel (D), plotted for comparison with the result of the simplified model.

#### 4. SUPPLEMENTARY TABLES

|                                                 | GFP/pMad gradient length scale<br>(distance to 50% max. intensity) | Non-zero tail<br>(relative to max. intensity) |
|-------------------------------------------------|--------------------------------------------------------------------|-----------------------------------------------|
| <b>Figure 1D</b>                                |                                                                    |                                               |
| <i>hh-NbI<sup>high</sup>CD8</i>                 | 30.1 ± 2.0 µm                                                      | 35.0 ± 4.0 %                                  |
| <i>hh-NbI<sup>high</sup>CD8</i> + fat body trap | 18.3 ± 2.5 µm                                                      | 6.4 ± 1.6 %                                   |
| <i>hh-NbI<sup>low</sup>CD8</i>                  | n/a                                                                | 77.2 ± 5.8%                                   |
| <b>Figure 3C</b>                                |                                                                    |                                               |
| <i>hh-Gal4, UAS- NbI<sup>high</sup>CD8</i>      | 4.7 ± 0.6 µm                                                       | 4.8 ± 1.6 %                                   |
| <b>Figure 4D</b>                                |                                                                    |                                               |
| Positive control                                | 11.6 ± 2.5 µm                                                      | 2.6 ± 0.8 %                                   |
| SR                                              | 9.0 ± 1.2 µm                                                       | 25.2 ± 4.3 %                                  |
| SR+SR                                           | 2.8 ± 1.4 µm                                                       | 4.8 ± 2.1 %                                   |
| SR+NR                                           | 29.7 ± 4.1 µm                                                      | 6.4 ± 5.0 %                                   |

**Table S1:** Length scales (distance where the gradient falls to 50% of its maximal intensity) and non-zero tail values (fluorescence intensity relative to the maximal intensity) of GFP (Fig. 1D and 3C) and pMad (Fig. 4D) gradients in the posterior wing disc compartment.

5

| Parameter                                                   | Name                                       | Value                | Unit                                  |                            |
|-------------------------------------------------------------|--------------------------------------------|----------------------|---------------------------------------|----------------------------|
| Free ligand diffusion constant                              | $D$                                        | 21                   | $\mu\text{m}^2.\text{s}^{-1}$         | As measured for Dpp (2)    |
| Thickness of intercellular space                            | $h$                                        | 20                   | nm                                    | Estimated from EM          |
| Tissue height                                               | $H$                                        | 53                   | $\mu\text{m}$                         | Measured (n=10 wing discs) |
| Length of one AP compartment                                | $L$                                        | 116                  | $\mu\text{m}$                         | Measured (n=10 wing discs) |
| Length of the source                                        | $L_S$                                      | 26                   | $\mu\text{m}$                         | Measured (n=11 wing discs) |
| Binding rate of GFP to $\text{Nb}^{\text{high}}$ (GBP1)     | $k_{\text{on}}^{\text{Nb}^{\text{high}}}$  | $7.7 \times 10^{-4}$ | $\text{nM}^{-1}.\text{s}^{-1}$        | (15, 34)                   |
| Unbinding rate of GFP from $\text{Nb}^{\text{high}}$ (GBP1) | $k_{\text{off}}^{\text{Nb}^{\text{high}}}$ | $1.7 \times 10^{-4}$ | $\text{s}^{-1}$                       | (15, 34)                   |
| Binding rate of GFP to $\text{Nb}^{\text{low}}$ (LAG3)      | $k_{\text{on}}^{\text{Nb}^{\text{low}}}$   | $2 \times 10^{-3}$   | $\text{nM}^{-1}.\text{s}^{-1}$        | (17)                       |
| Unbinding rate of GFP from $\text{Nb}^{\text{low}}$ (LAG3)  | $k_{\text{off}}^{\text{Nb}^{\text{low}}}$  | $5 \times 10^{-2}$   | $\text{s}^{-1}$                       | (17)                       |
| Ligand production rate in the source                        | $j$                                        | 0.3                  | $\text{nM}.\text{s}^{-1}$             | Fitted                     |
| Leakage rate to hemolymph                                   | $\kappa$                                   | 0.075                | $\text{s}^{-1}$                       | Fitted                     |
| Rescaled degradation rate in hemolymph                      | $\bar{k}_H$                                | 0.01                 | $\text{s}^{-1}$                       | Fitted                     |
| Rescaled degradation rate in hemolymph, fat body experiment | $\bar{k}_H^{\text{FB}}$                    | 0.19                 | $\text{s}^{-1}$                       | Fitted                     |
| Receptor production rate                                    | $j_r$                                      | 0.0026               | $\text{nM}.\mu\text{m}.\text{s}^{-1}$ | Fitted                     |

**Table S2.** Parameters for the single receptor model (EM = electron microscopy).

| Parameter                                    | Name                       | Value                        | Unit                                              |                                                               |
|----------------------------------------------|----------------------------|------------------------------|---------------------------------------------------|---------------------------------------------------------------|
| GFP dimer diffusion constant                 | $D$                        | $21 \times 2^{-\frac{1}{3}}$ | $\mu\text{m}^2 \cdot \text{s}^{-1}$               | Estimated from D in Table S2                                  |
| Effective NR diffusion constant              | $D_r$                      | 0.1                          | $\mu\text{m}^2 \cdot \text{s}^{-1}$               | (47, 48)                                                      |
| Degradation rate signaling configuration     | $k^{aa}$                   | $2.1 \times 10^{-3}$         | $\text{s}^{-1}$                                   | (2)                                                           |
| Degradation rate non-signaling configuration | $k^a, k^b, k^{bb}, k^{ab}$ | $2.6 \times 10^{-5}$         | $\text{s}^{-1}$                                   | from $j^r$ by fixing $n_T = 100 \text{ nM} \cdot \mu\text{m}$ |
| SR production rate                           | $j_r^a$                    | $2.6 \times 10^{-3}$         | $\text{nM} \cdot \mu\text{m} \cdot \text{s}^{-1}$ | as in Table S2                                                |
| NR production rate                           | $j_r^b$                    | $2.6 \times 10^{-3}$         | $\text{nM} \cdot \mu\text{m} \cdot \text{s}^{-1}$ | as in Table S2                                                |

**Table S3:** Parameters for the numerical simulations of the two-receptor models. Unlisted parameters are as in Table S2 or given in the Supplementary Theory text.



## 5. SUPPLEMENTARY REFERENCES

34. M. H. Kubala, O. Kovtun, K. Alexandrov, B. M. Collins, Structural and thermodynamic analysis of the GFP:GFP-nanobody complex. *Protein Sci.* **19**, 2389-2401 (2010).
35. A. Kicheva *et al.*, Kinetics of morphogen gradient formation. *Science* **315**, 521-525 (2007).
36. F. Zhang *et al.*, Quantification of epidermal growth factor receptor expression level and binding kinetics on cell surfaces by surface plasmon resonance imaging. *Anal. Chem.* **87**, 9960-9965 (2015).
37. T. Tabata, S. Eaton, T. B. Kornberg, The Drosophila hedgehog gene is expressed specifically in posterior compartment cells and is a target of engrailed regulation. *Genes & Development* **6**, 2635-2645 (1992).
38. J. J. Lee, D. P. von Kessler, S. Parks, P. A. Beachy, Secretion and localized transcription suggest a role in positional signaling for products of the segmentation gene hedgehog. *Cell* **71**, 33-50 (1992).
39. J. E. Hooper, Smoothened translates Hedgehog levels into distinct responses. *Development (Cambridge, England)* **130**, 3951-3963 (2003).
40. B. Glise, D. L. Jones, P. W. Ingham, Notch and Wingless modulate the response of cells to Hedgehog signalling in the Drosophila wing. *Dev. Biol.* **248**, 93-106 (2002).
41. A. Kopp, I. Duncan, Anteroposterior patterning in adult abdominal segments of Drosophila. *Dev. Biol.* **242**, 15-30 (2002).
42. C. Zihni, C. Mills, K. Matter, M. S. Balda, Tight junctions: from simple barriers to multifunctional molecular gates. *Nat. Rev. Mol. Cell Biol.* **17**, 564-580 (2016).
43. L. Hufnagel, J. Kreuger, S. M. Cohen, B. I. Shraiman, On the role of glypicans in the process of morphogen gradient formation. *Dev. Biol.* **300**, 512-522 (2006).
44. T. Kirsch, W. Sebald, M. K. Dreyer, Crystal structure of the BMP-2-BRIA ectodomain complex. *Nat. Struct. Biol.* **7**, 492-496 (2000).
45. J. Thurmond *et al.*, FlyBase 2.0: the next generation. *Nucleic Acids Res.* **47**, D759-D765 (2019).
46. B. R. Graveley *et al.*, The developmental transcriptome of Drosophila melanogaster. *Nature* **471**, 473-479 (2011).
47. S. Saha, A. A. Anilkumar, S. Mayor, GPI-anchored protein organization and dynamics at the cell surface. *J. Lipid Res.* **57**, 159-175 (2016).
48. S. Wieser, M. Moertelmaier, E. Fuerbauer, H. Stockinger, G. J. Schutz, (Un)confined diffusion of CD59 in the plasma membrane determined by high-resolution single molecule microscopy. *Biophys. J.* **92**, 3719-3728 (2007).
49. L. A. Baena-López, C. Alexandre, A. Mitchell, L. Pasakarnis, J.-P. Vincent, Accelerated homologous recombination and subsequent genome modification in Drosophila. *Development* **140**, 4818-4825 (2013).
50. R. Yagi, F. Mayer, K. Basler, Refined LexA transactivators and their use in combination with the Drosophila Gal4 system. *Proc. Natl. Acad. Sci. U. S. A.* **107**, 16166-16171 (2010).
51. M. Brankatschk, S. Eaton, Lipoprotein particles cross the blood-brain barrier in Drosophila. *J. Neurosci.* **30**, 10441-10447 (2010).
52. S. Pfeiffer, C. Alexandre, M. Calleja, J. P. Vincent, The progeny of wingless-expressing cells deliver the signal at a distance in Drosophila embryos. *Curr. Biol.* **10**, 321-324 (2000).

53. I. J. McGough *et al.*, Glypicans shield the Wnt lipid moiety to enable signalling at a distance. *Nature* **in press**, (2020).
54. S. J. Gratz *et al.*, Genome engineering of *Drosophila* with the CRISPR RNA-guided Cas9 nuclease. *Genetics* **194**, 1029-1035 (2013).
55. Z. Liu *et al.*, Systematic comparison of 2A peptides for cloning multi-genes in a polycistronic vector. *Sci. Rep.* **7**, 2193 (2017).
56. J. Shen, C. Dahmann, G. O. Pflugfelder, Spatial discontinuity of optomotor-blind expression in the *Drosophila* wing imaginal disc disrupts epithelial architecture and promotes cell sorting. *BMC Dev. Biol.* **10**, 23 (2010).
57. J. Schindelin *et al.*, Fiji: an open-source platform for biological-image analysis. *Nat. Methods* **9**, 676-682 (2012).
58. L. Couturier, M. Trylinski, K. Mazouni, L. Darnet, F. Schweisguth, A fluorescent tagging approach in *Drosophila* reveals late endosomal trafficking of Notch and Sanpodo. *The Journal of cell biology* **207**, 351-363 (2014).
59. E. Engelowski *et al.*, Synthetic cytokine receptors transmit biological signals using artificial ligands. *Nat. Commun.* **9**, 2034 (2018).
60. T. Huang *et al.*, TGF-beta signalling is mediated by two autonomously functioning TbetaRI:TbetaRII pairs. *EMBO J.* **30**, 1263-1276 (2011).
61. S. E. St Pierre, M. I. Galindo, J. P. Couso, S. Thor, Control of *Drosophila* imaginal disc development by rotund and roughened eye: differentially expressed transcripts of the same gene encoding functionally distinct zinc finger proteins. *Development* **129**, 1273-1281 (2002).

Figure S1

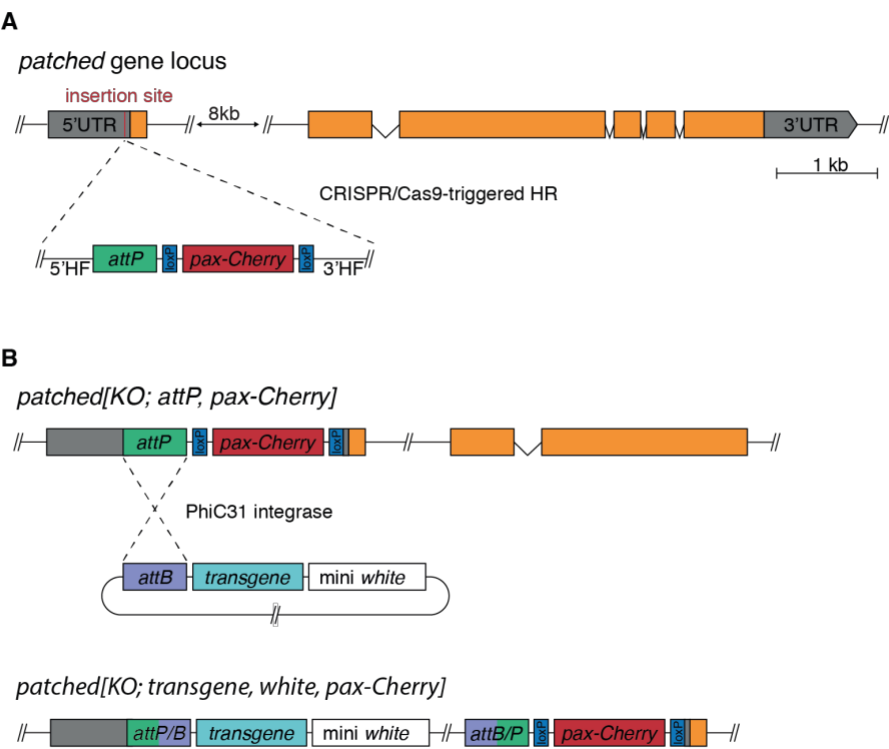

Figure S2

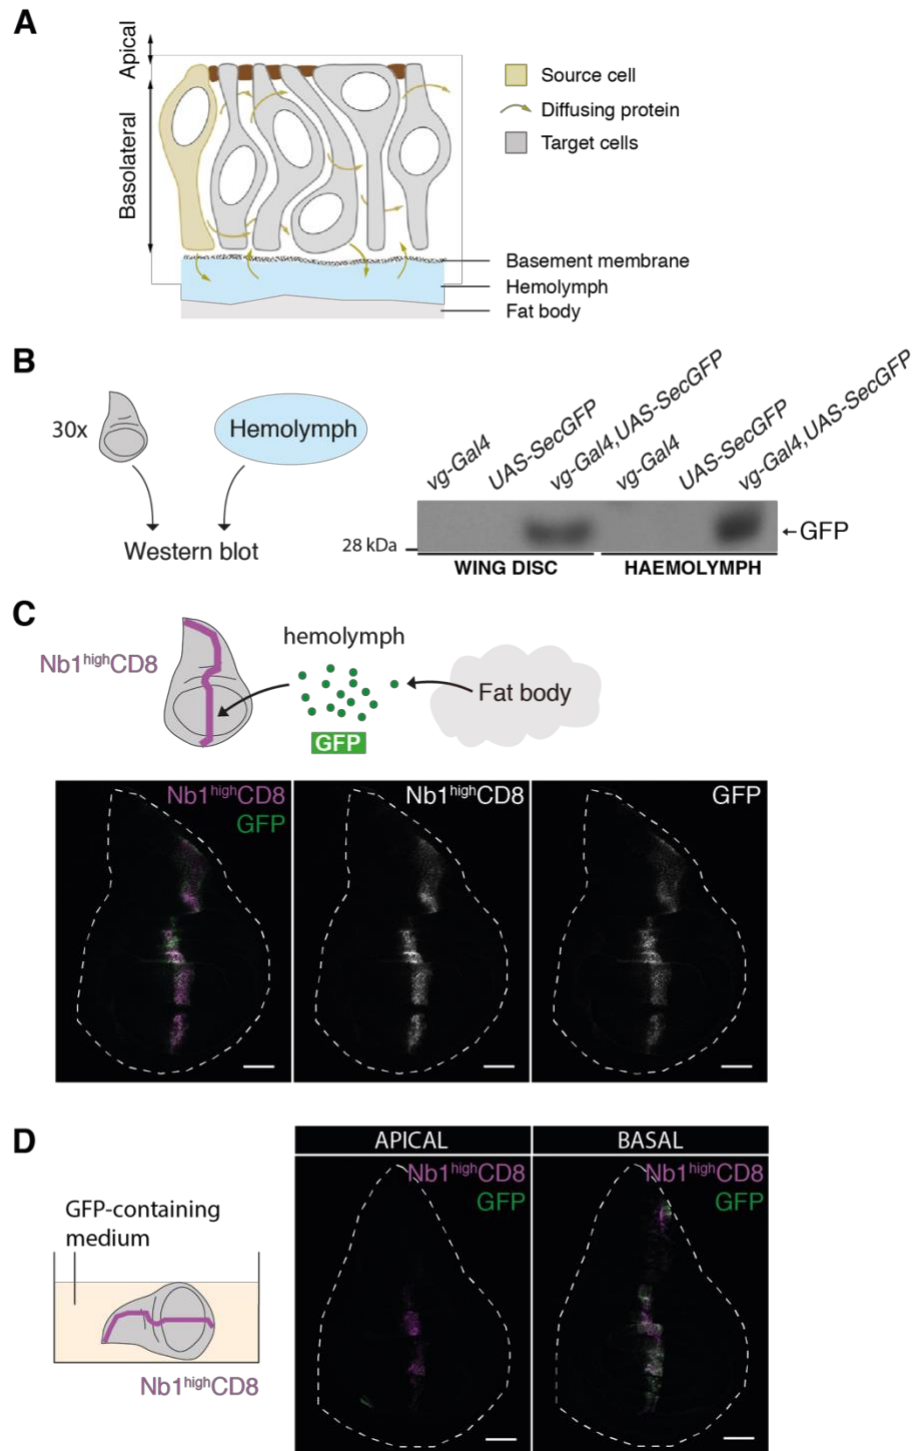

Figure S3

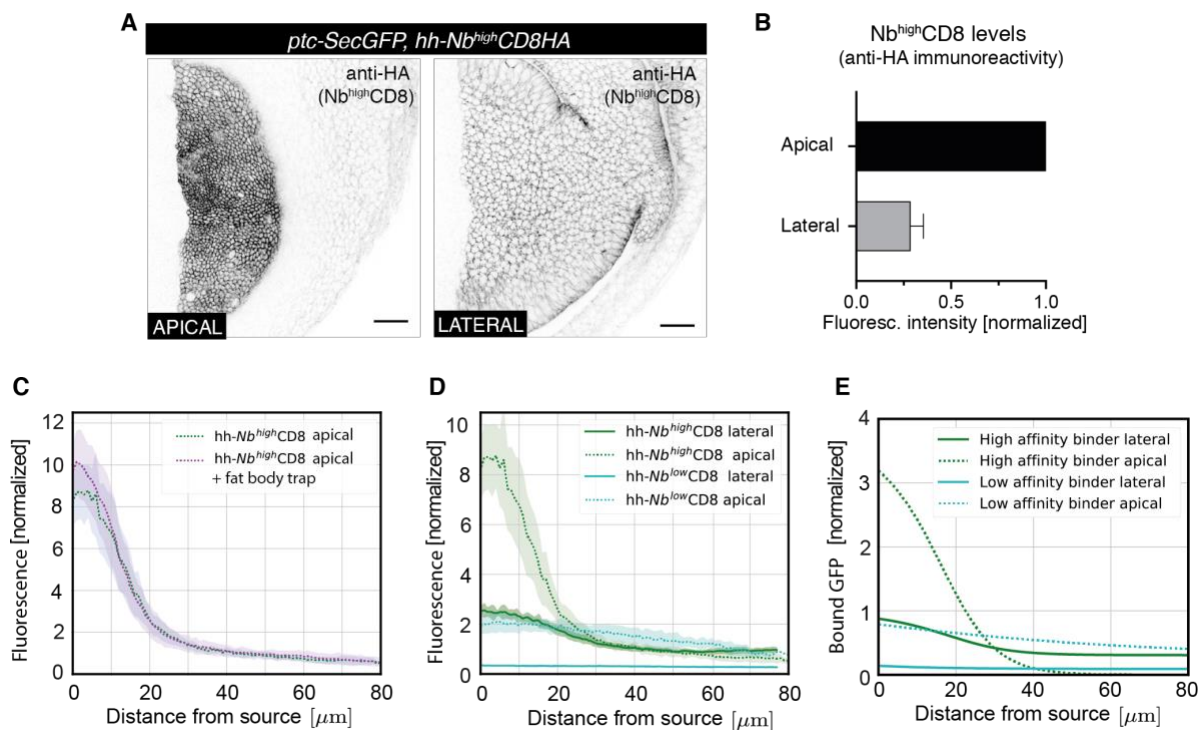

Figure S4

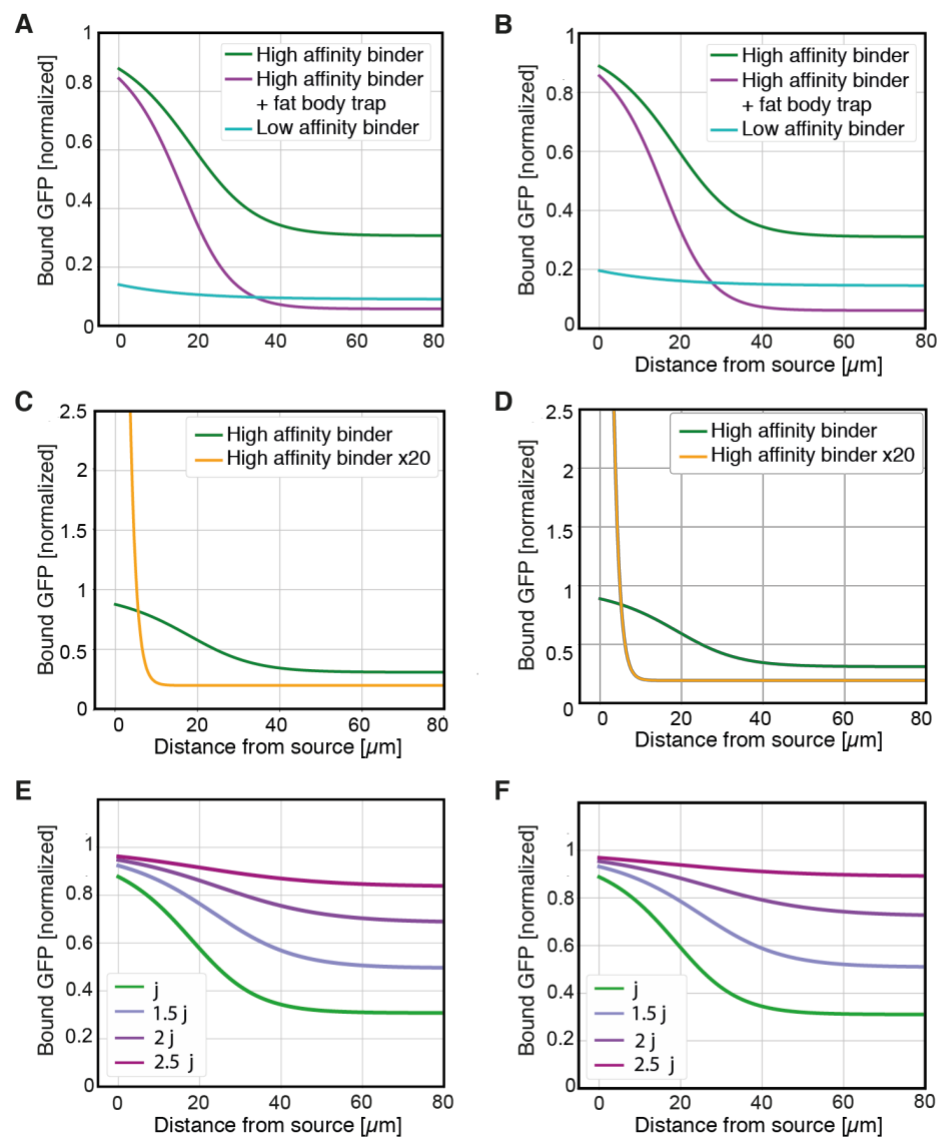

# Figure S5

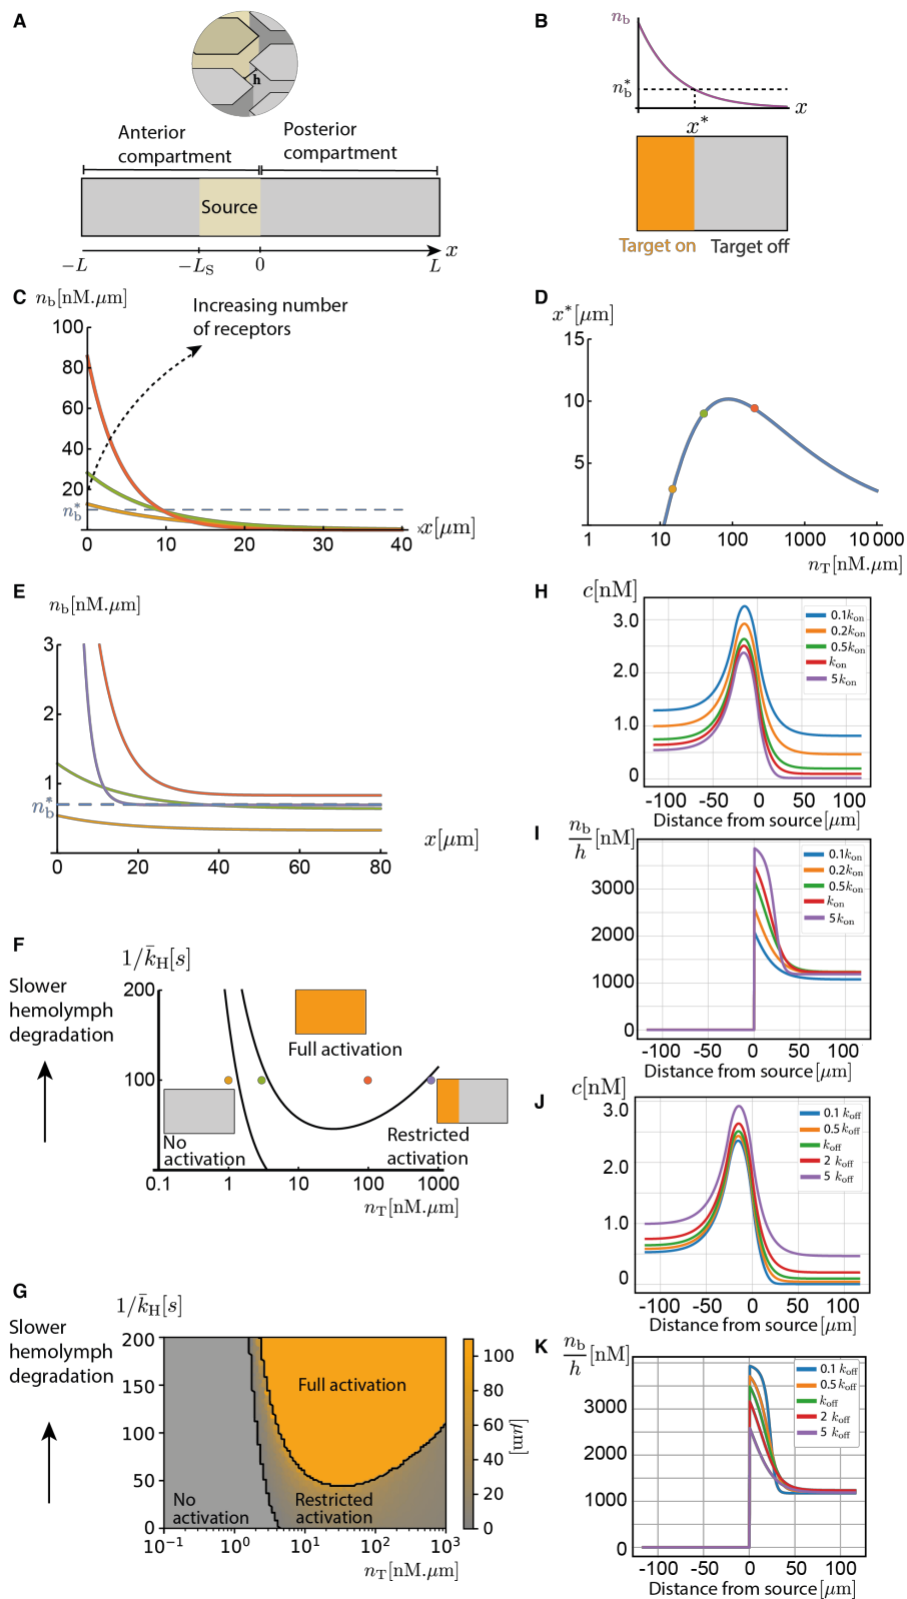

# Figure S6

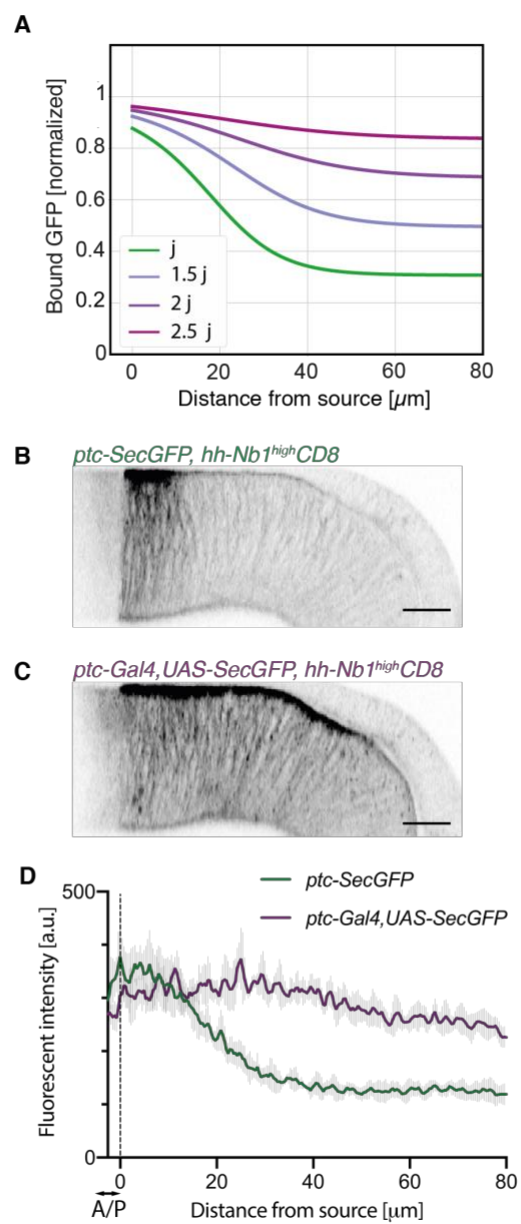



# Figure S7

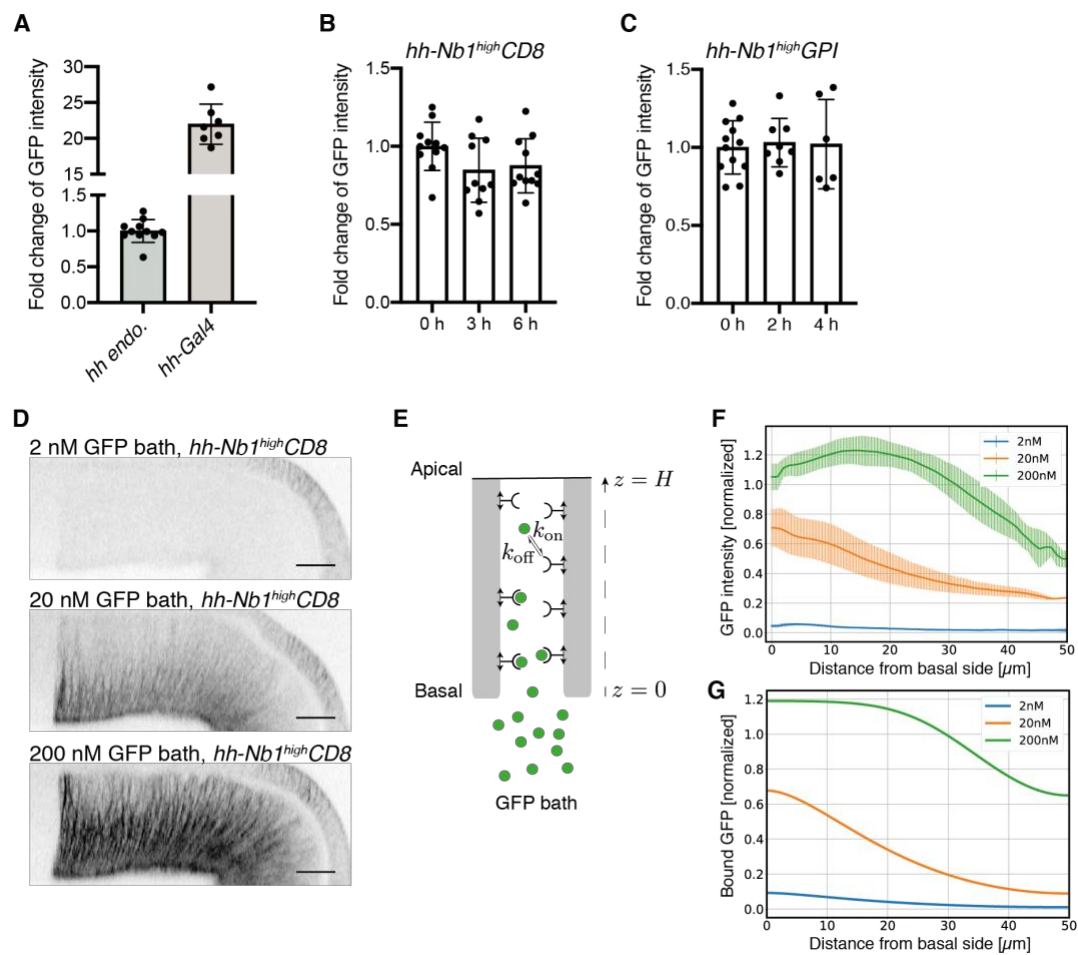

Figure S8

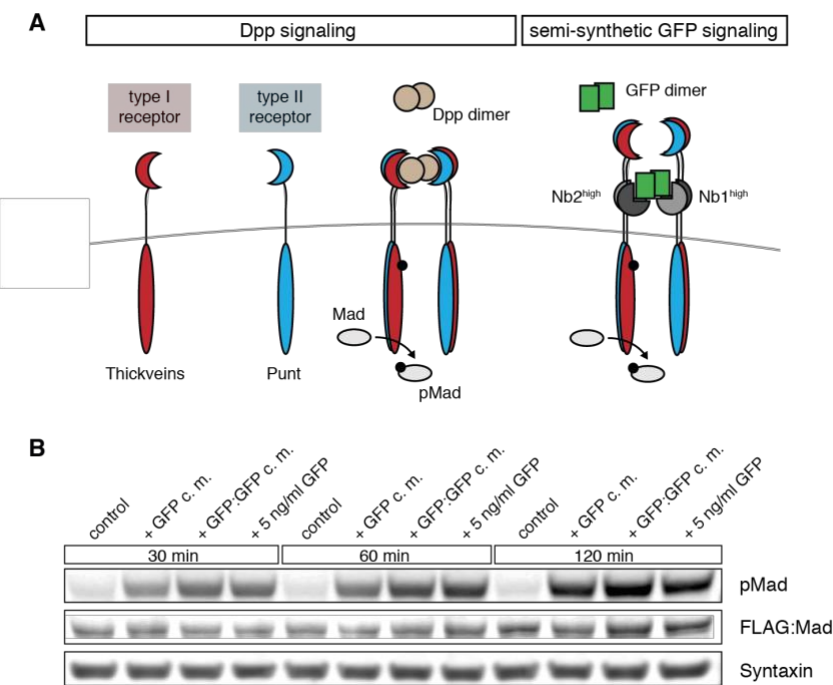

# Figure S9

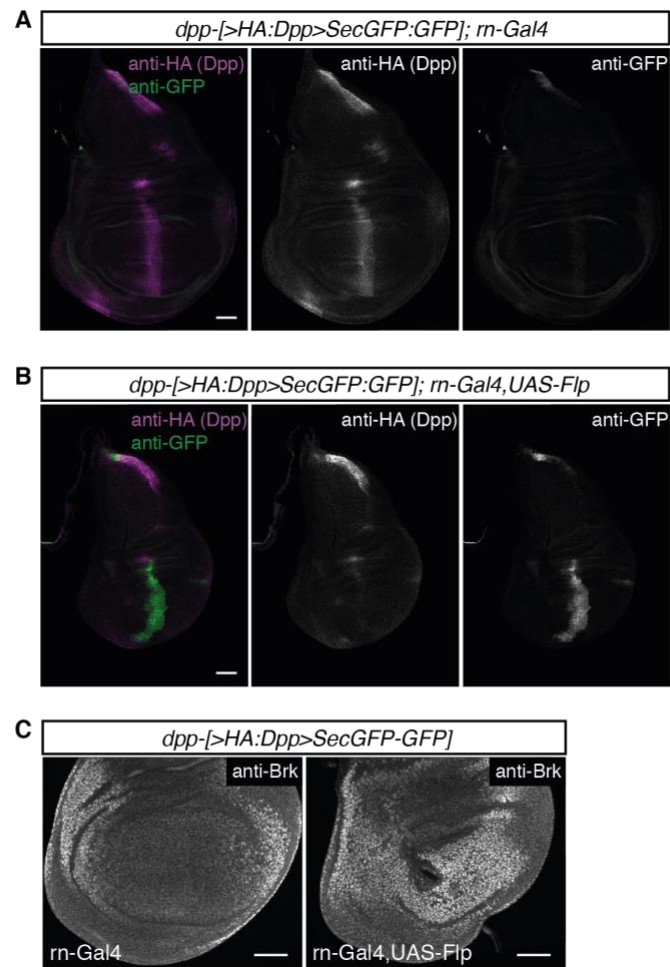

Figure S10

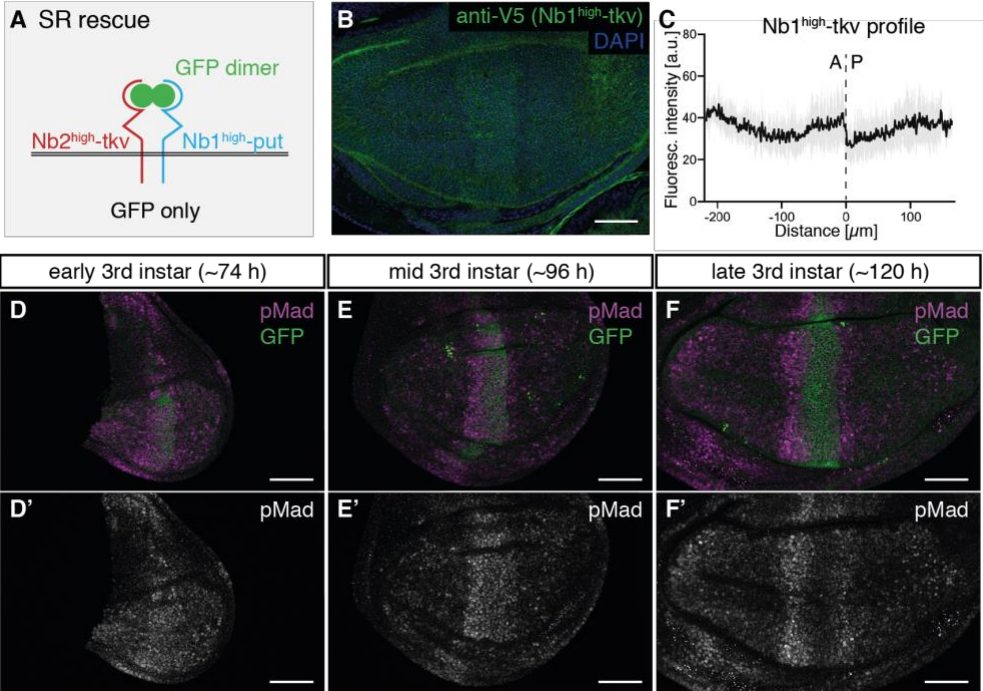

Figure S11

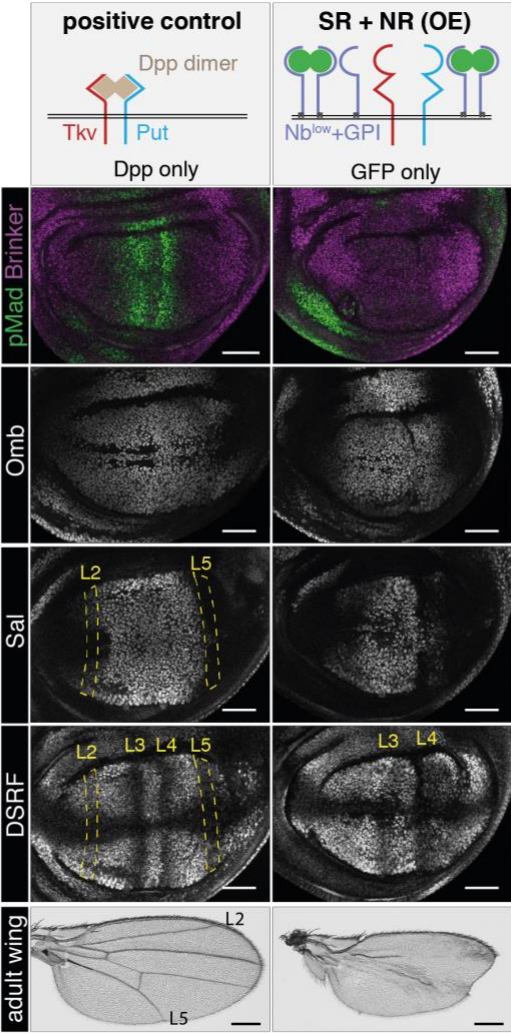

### Figure S12

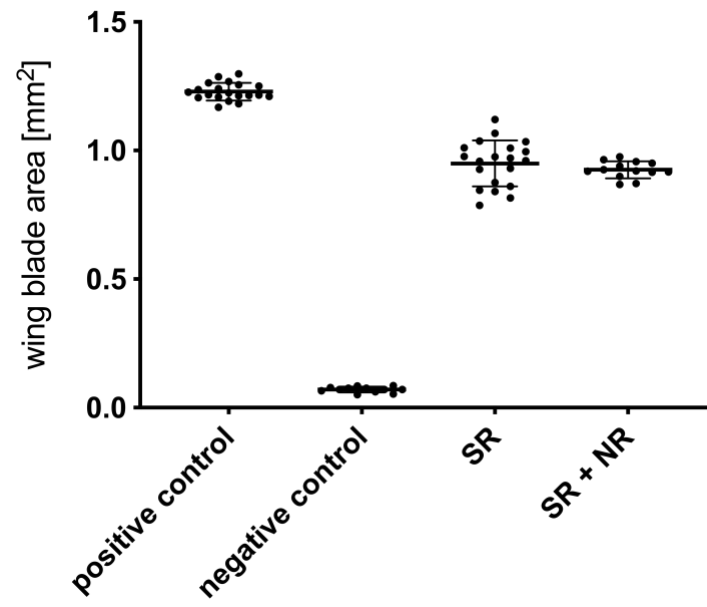

# Figure S13

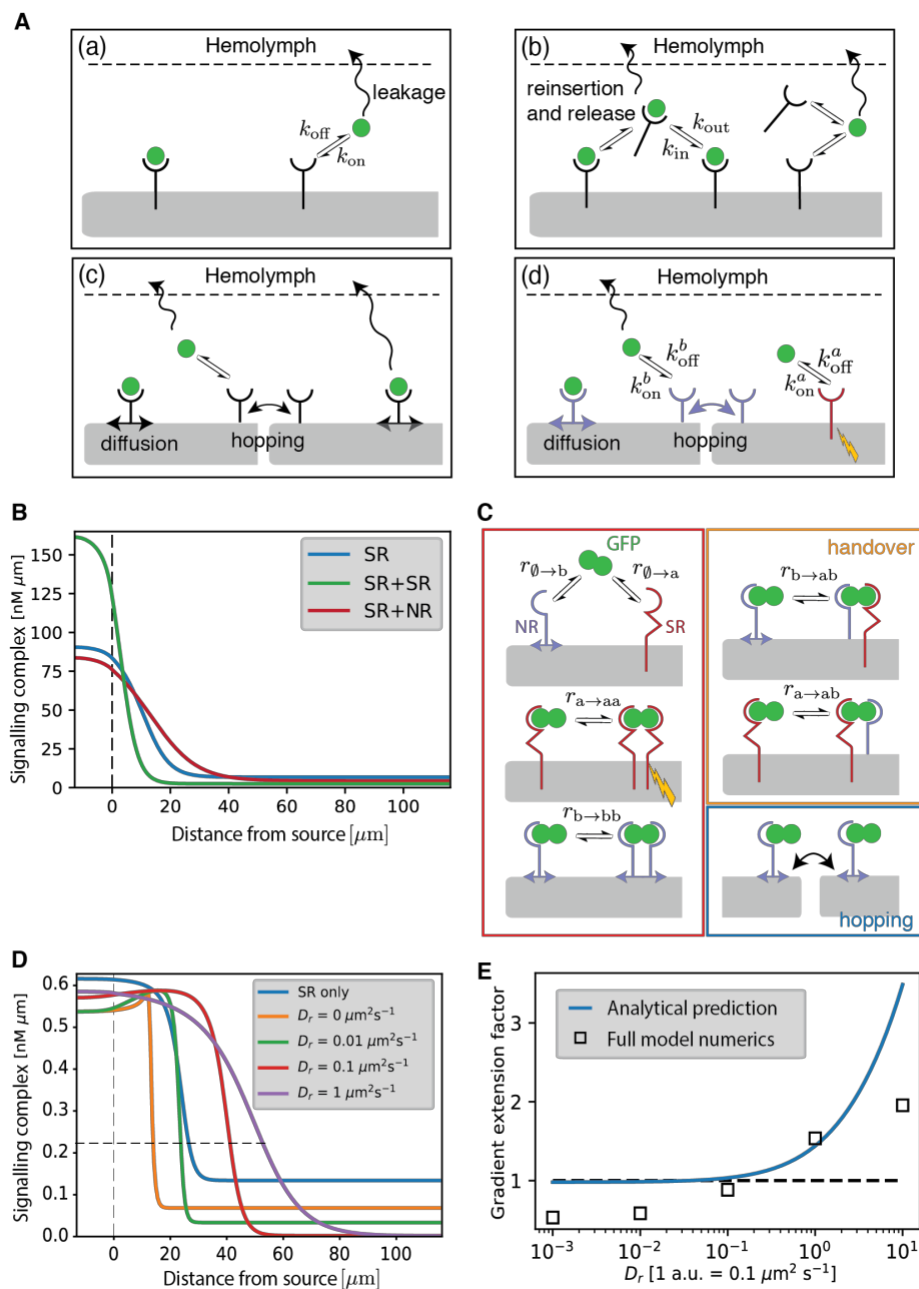

Supplement: EMS124721-supplement-Supplementary_Material.pdf [file EMS124721-supplement-Supplementary_Material.pdf]
